# Supplementary material for: Brahma-related gene-1 promotes tubular senescence and renal fibrosis through Wnt/β-catenin/autophagy axis
Source: Oxford University Press journal article supplement (doi:10.1042/cs20210447), 2021-07-28
Supplement: cs-2021-0447_supp.pdf [file cs-2021-0447_supp.pdf]

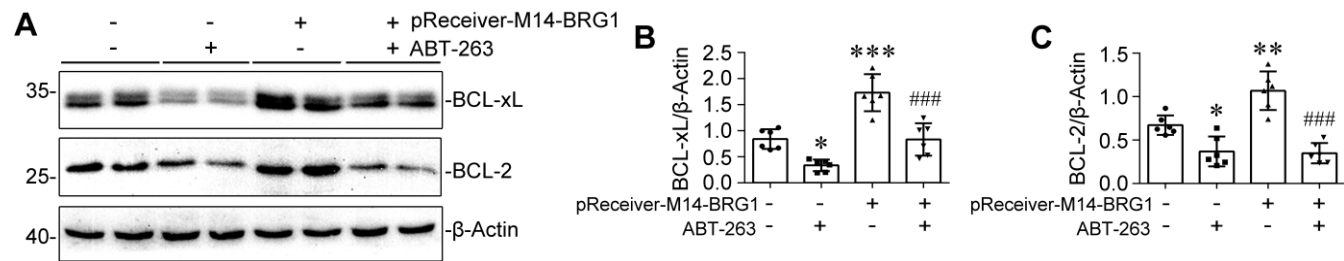

**Supplementary Figure 1. The effects of ABT-263 treatment and BRG1 overexpression on the expression of BCL-xL and BCL-2 *in vivo*.** (A-C) Western blot analysis showed renal expression of BCL-xL and BCL-2 proteins in four groups as indicated. Representative western blot (A) and quantitative data on the relative abundance of BCL-xL (B) and BCL-2 (C) proteins in different groups are presented. \* $P < 0.05$ , \*\* $P < 0.01$ , \*\*\* $P < 0.001$  versus control group; ### $P < 0.001$  versus pReceiver-M14-BRG1 injection alone (n=6).

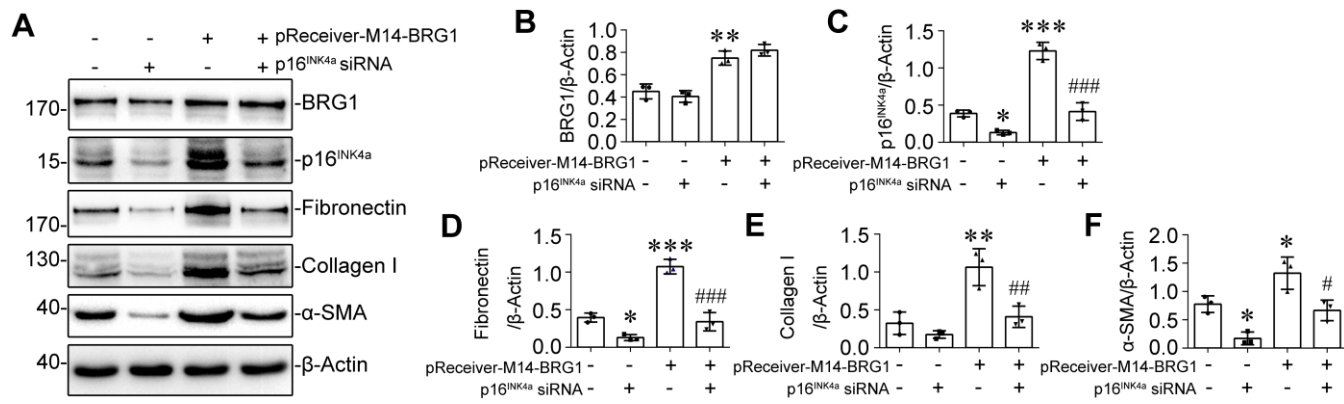

**Supplementary Figure 2. Knockdown of p16<sup>INK4a</sup> inhibits BRG1-induced fibrotic responses in renal tubular epithelial cells.** (A-F) Western blot analysis demonstrated that knockdown of p16<sup>INK4a</sup> inhibited BRG1-induced fibronectin, collagen I and α-SMA protein expression in cultured tubular epithelial cells. mTECs cells were co-transfected with BRG1 expression plasmid (pReceiver-M14-BRG1) and p16<sup>INK4a</sup>-specific siRNA for 48 h. Representative western blot (A) and quantitative data on the relative abundance of BRG1 (B), p16<sup>INK4a</sup> (C), fibronectin (D), collagen I (E) and α-SMA (F) are presented. \**P* < 0.05, \*\**P* < 0.01, \*\*\**P* < 0.001 versus control group; #*P* < 0.05, ##*P* < 0.01, ###*P* < 0.001 versus pReceiver-M14-BRG1 transfection alone (n=3).

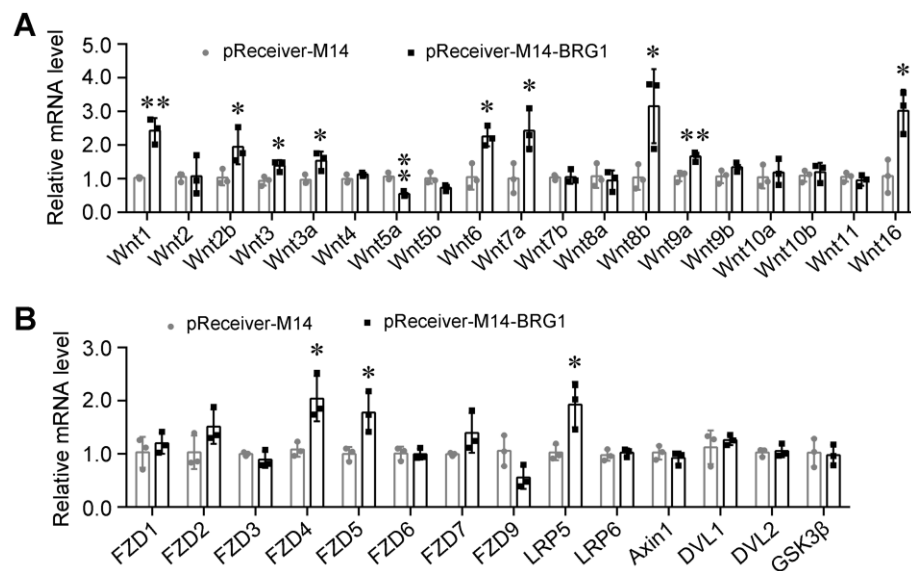

**Supplementary Figure 3. The effects of BRG1 overexpression on the expression of Wnt ligands and Wnt receptors in renal tubular epithelial cells.** (A-B) qRT-PCR results demonstrated the relative mRNA expression levels of Wnt ligands (A) and Wnt receptors (B) in mTECs cells in different groups as indicated. mTECs cells were transfected with control vector (pReceiver-M14) or BRG1 overexpression plasmid (pReceiver-M14-BRG1) for 48 h. \* $P < 0.05$ , \*\* $P < 0.01$  versus pReceiver-M14 group (n=3).

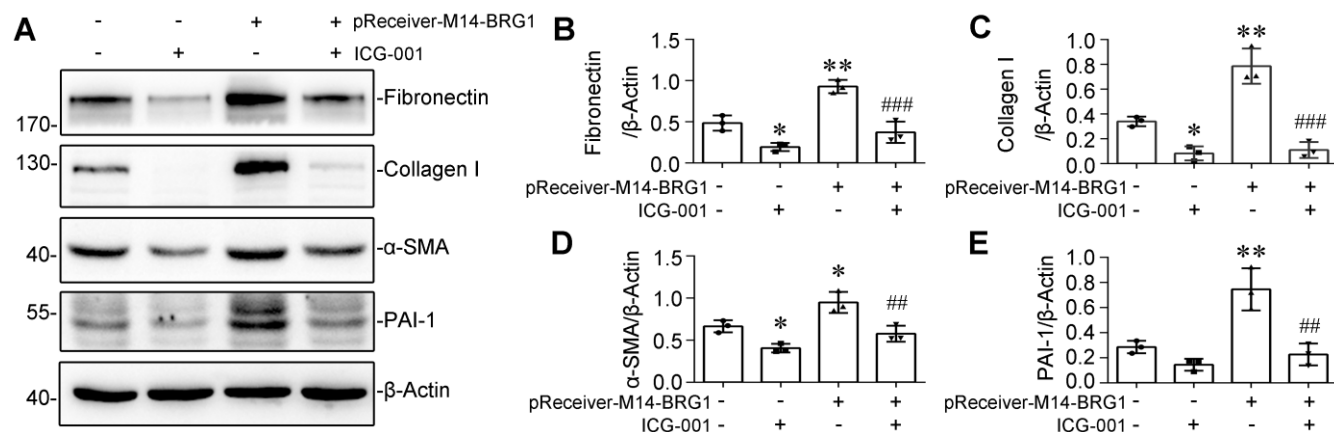

**Supplementary Figure 4. ICG-001 inhibits BRG1-induced fibrotic responses in renal tubular epithelial cells.** (A-E) Western blot analysis showed that BRG1-induced fibronectin, collagen I,  $\alpha$ -SMA and PAI-1 expression were inhibited by ICG-001 treatment. mTECs cells were transfected with BRG1 expression vector (pReceiver-M14-BRG1), followed by stimulation with Wnt/ $\beta$ -catenin signalling inhibitor ICG-001 (5 $\mu$ M) for 48 h. Representative western blot (A) and quantitative data on the relative abundance of fibronectin (B), collagen I (C),  $\alpha$ -SMA (D) and PAI-1 (E) proteins in different groups are presented. \* $P$ <0.05, \*\* $P$ <0.01 versus control groups; ## $P$ <0.01, ### $P$ <0.001 versus pReceiver-M14-BRG1 transfection alone (n=3).

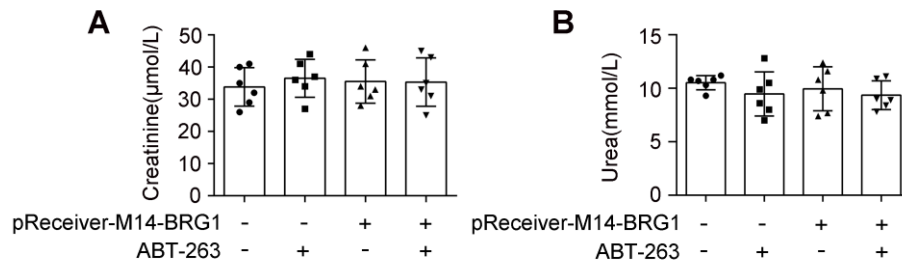

**Supplementary Figure 5. Effects of ABT-263 treatment and BRG1 overexpression on the renal function in uninephrectomized mice.** Renal function was evaluated by measuring serum creatinine (A) and serum urea (B) levels (n=6).

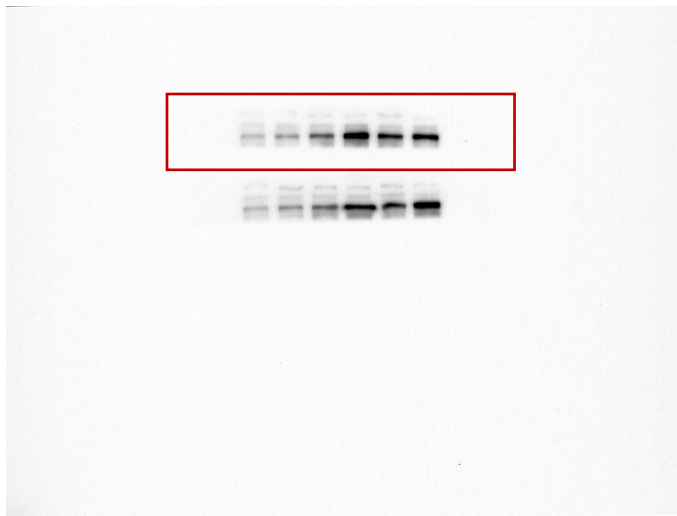

BRG1

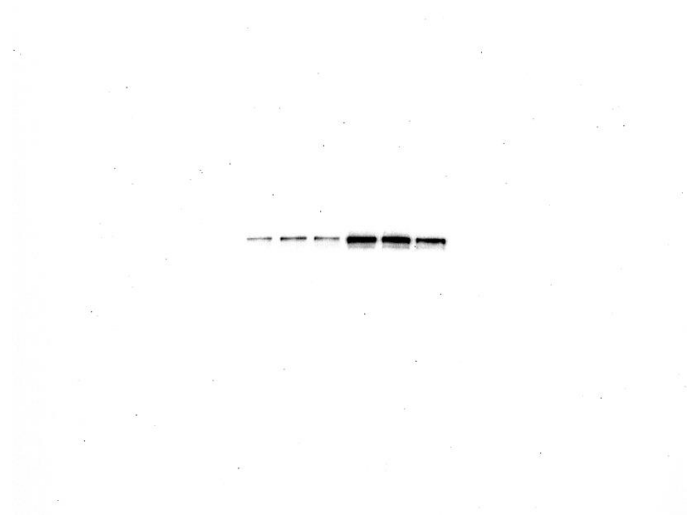

Fibronectin

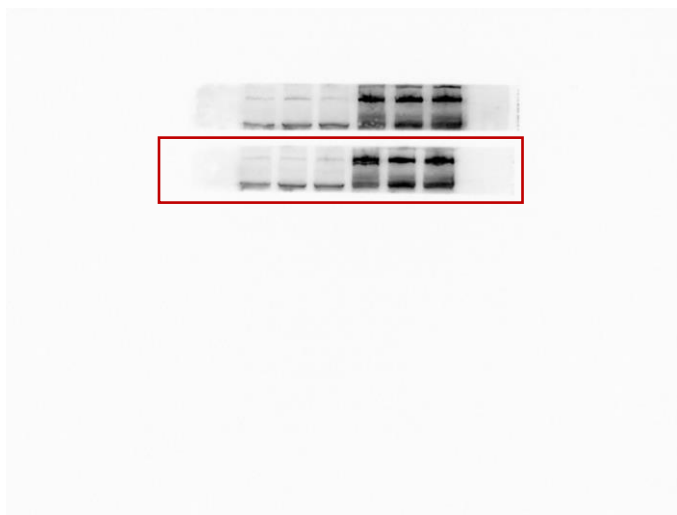

Collagen I

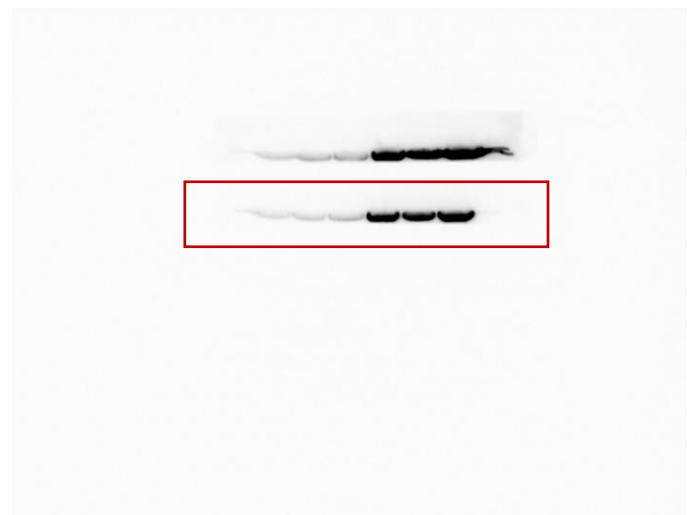

α-SMA

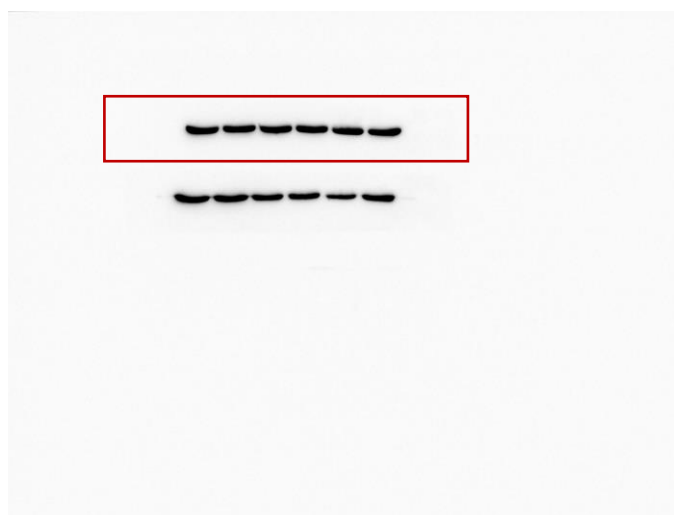

β-Actin

**Figure 1**

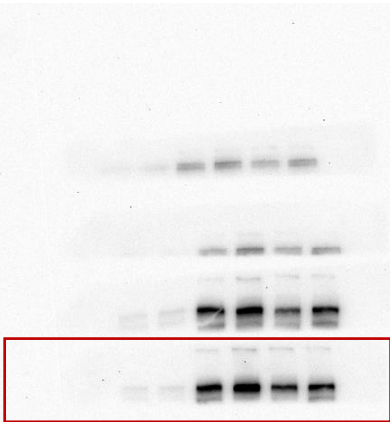

Figure 2B. BRG1

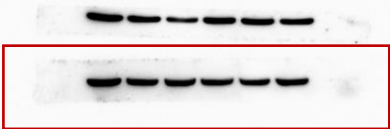

Figure 2B.  $\beta$ -Actin

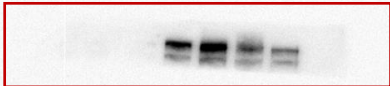

Figure 2F. Fibronectin

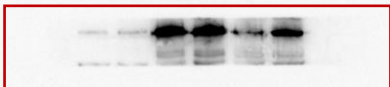

Figure 2F. Collagen I

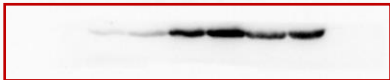

Figure 2F.  $\alpha$ -SMA

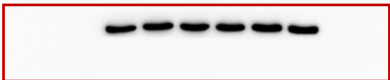

Figure 2F.  $\beta$ -Actin

**Figure 2**

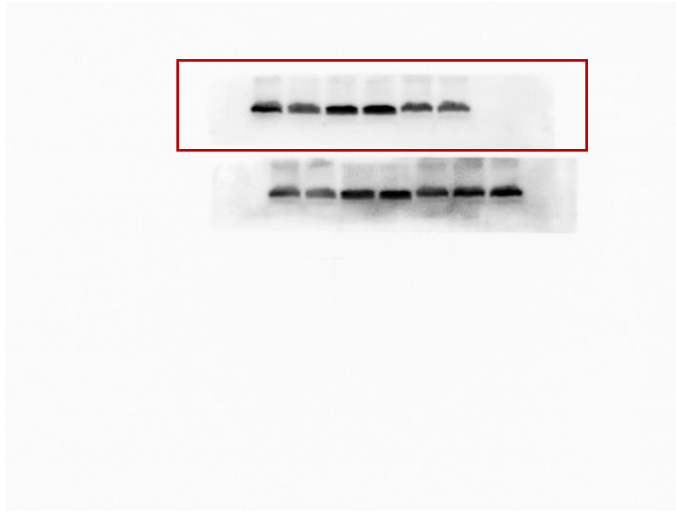

Figure 3A. p16<sup>INK4a</sup>

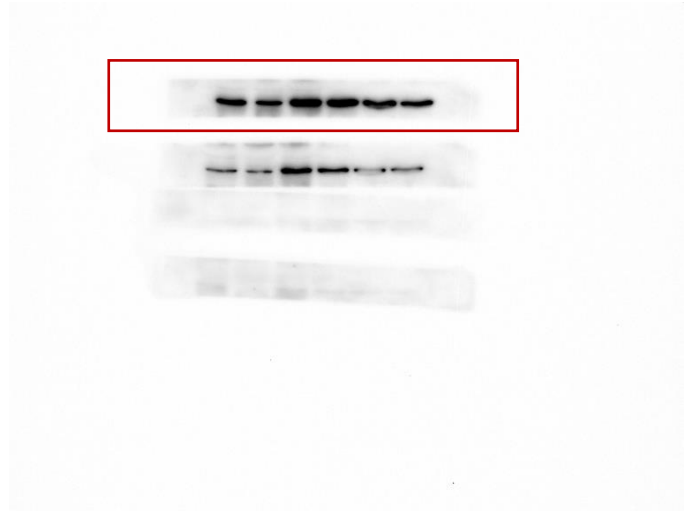

Figure 3A. p21

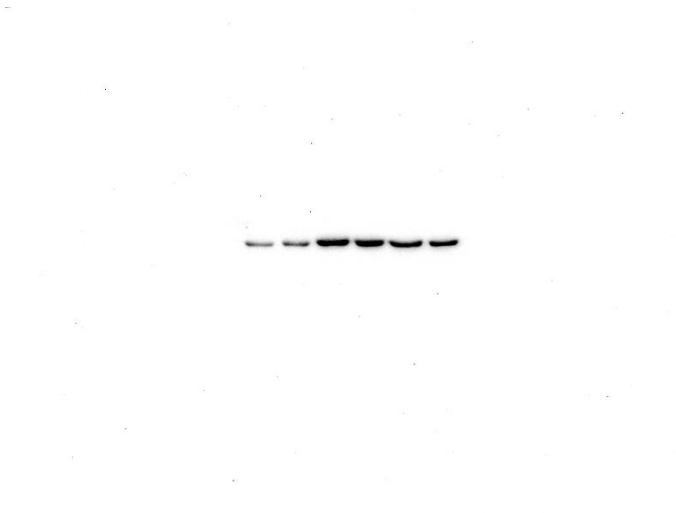

Figure 3A. p19<sup>ARF</sup>

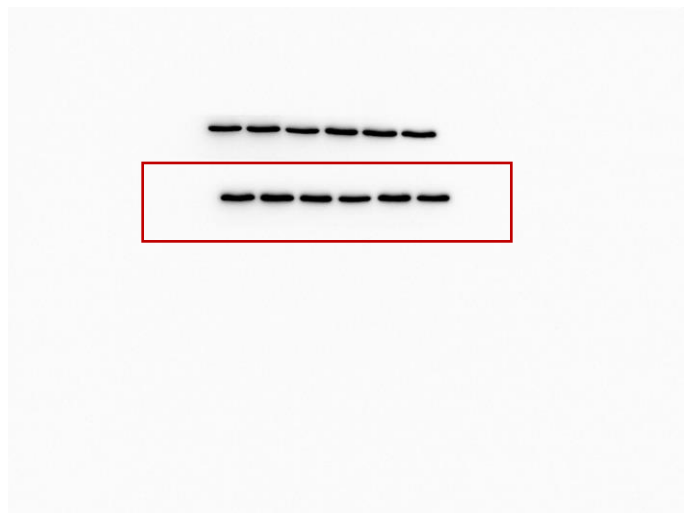

Figure 3A.  $\beta$ -Actin

## Figure 3



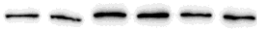

Figure 3F. active-β-catenin

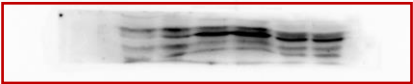

Figure 3F. MMP-7

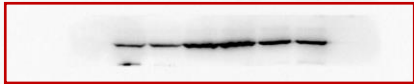

Figure 3F. Snail-1

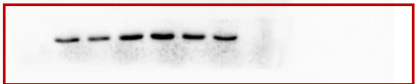

Figure 3F. PAI-1

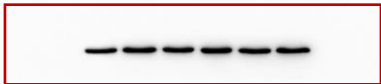

Figure 3F. β-Actin

**Figure 3**

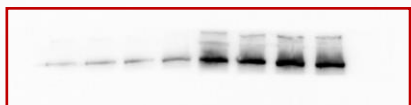

Figure 4B. BRG1

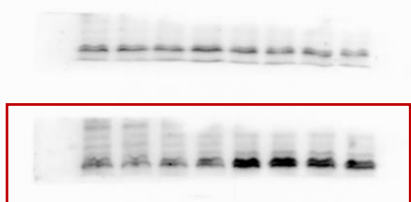

Figure 4B. p16<sup>INK4a</sup>

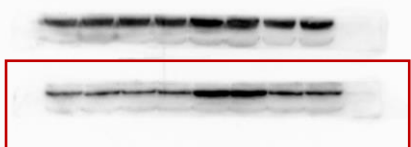

Figure 4B. p21

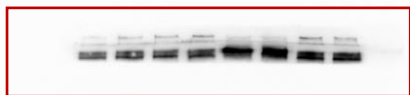

Figure 4B. Fibronectin

## Figure 4

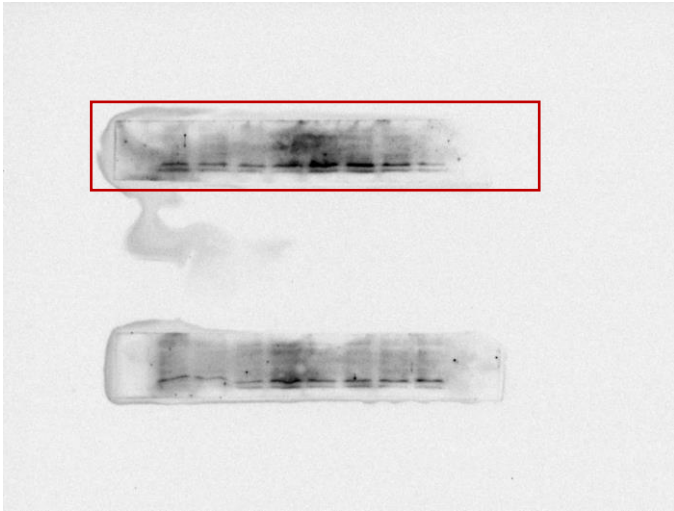

Figure 4B. Collagen I

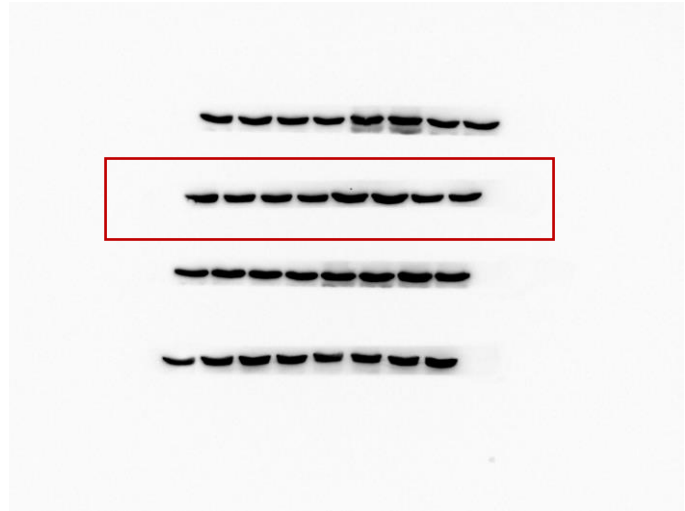

Figure 4B.  $\alpha$ -SMA

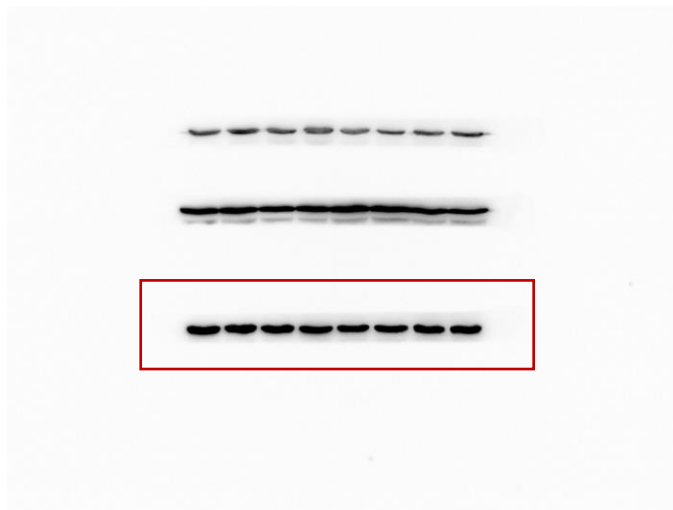

Figure 4B.  $\beta$ -Actin

## Figure 4

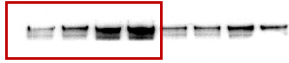

Figure 5A. BRG1

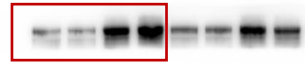

Figure 5A. Fibronectin

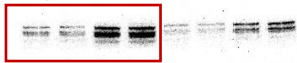

Figure 5A. Collagen I

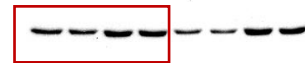

Figure 5A.  $\alpha$ -SMA

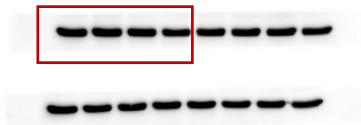

Figure 5A.  $\beta$ -Actin

## Figure 5

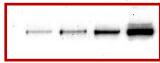

Figure 5G. BRG1

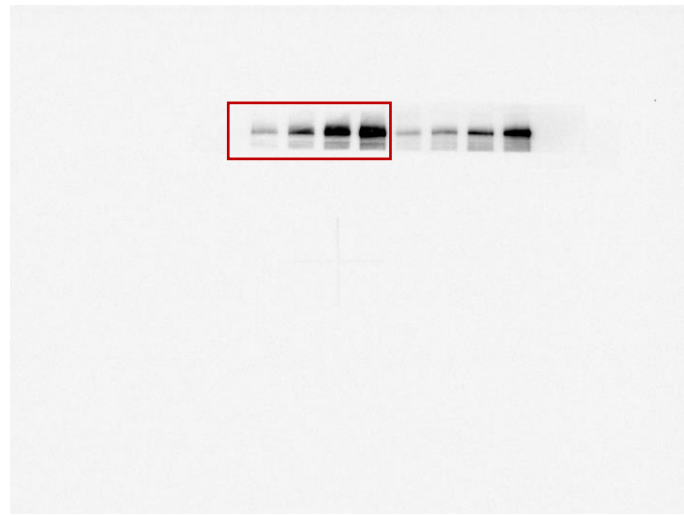

Figure 5G. Fibronectin

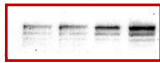

Figure 5G. Collagen I

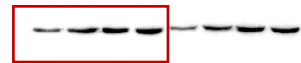

Figure 5G.  $\alpha$ -SMA

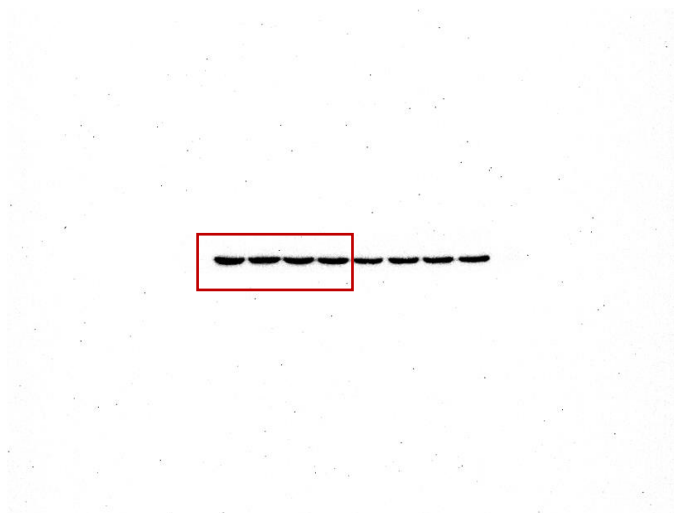

Figure 5G.  $\beta$ -Actin

## Figure 5

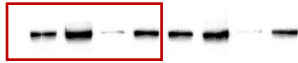

Figure 5L. BRG1

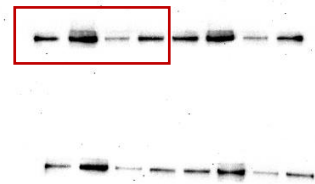

Figure 5L. Fibronectin

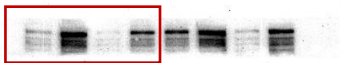

Figure 5L. Collagen I

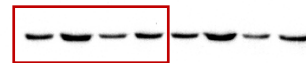

Figure 5L.  $\alpha$ -SMA

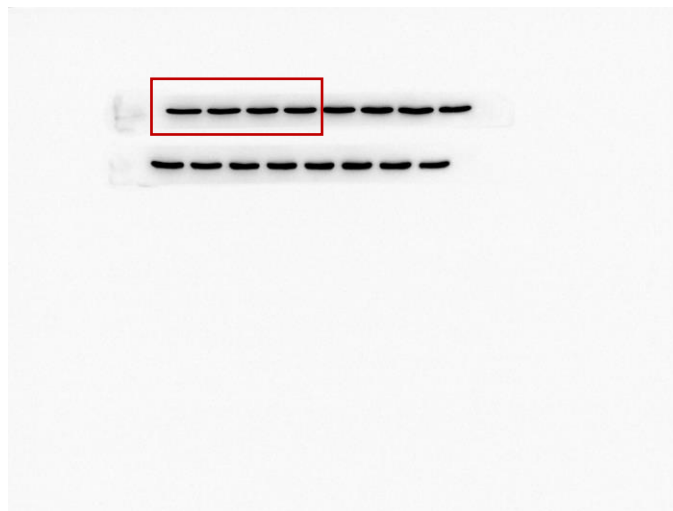

Figure 5L.  $\beta$ -Actin

## Figure 5

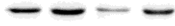

Figure 6C. p16<sup>INK4a</sup>

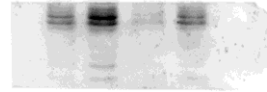

Figure 6C. p19<sup>ARF</sup>

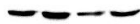

Figure 6C. p21

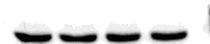

Figure 6C.  $\beta$ -Actin

## Figure 6

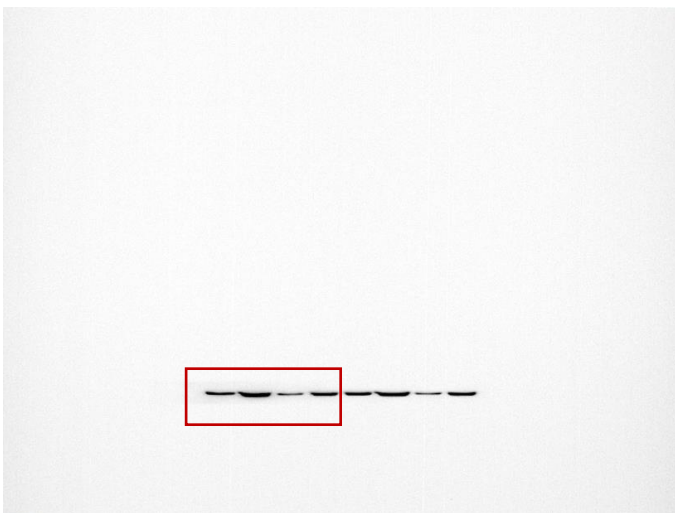

Figure 6G. p16<sup>INK4a</sup>

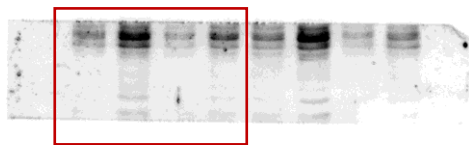

Figure 6G. p19<sup>ARF</sup>

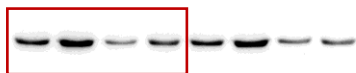

Figure 6G. p21

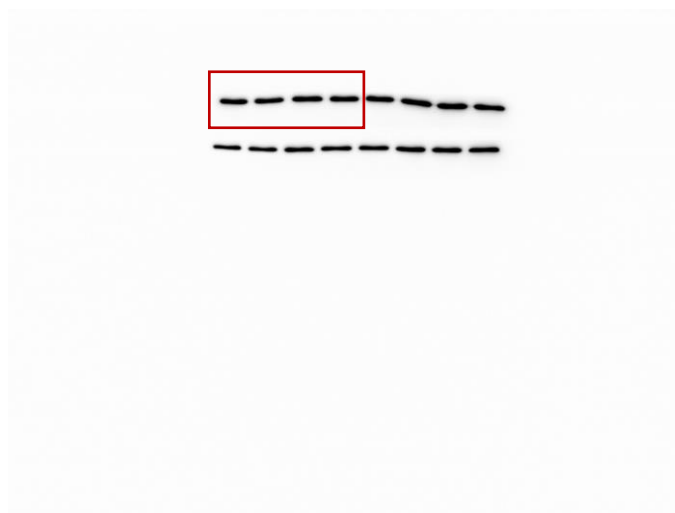

Figure 6G.  $\beta$ -Actin

## Figure 6



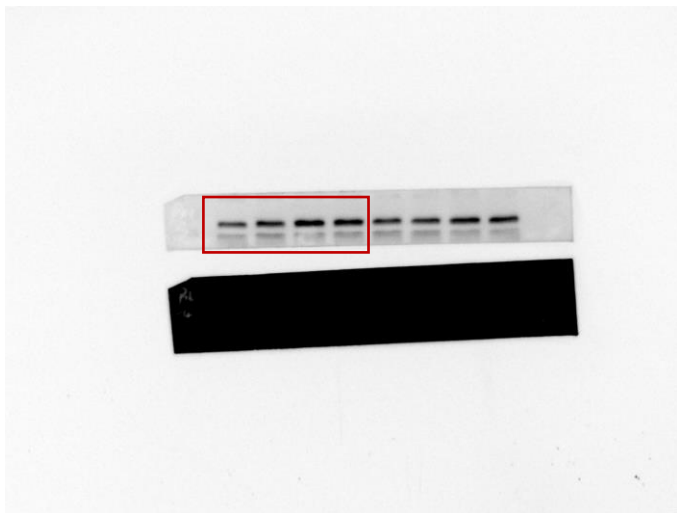

Figure 6I. p16<sup>INK4a</sup>

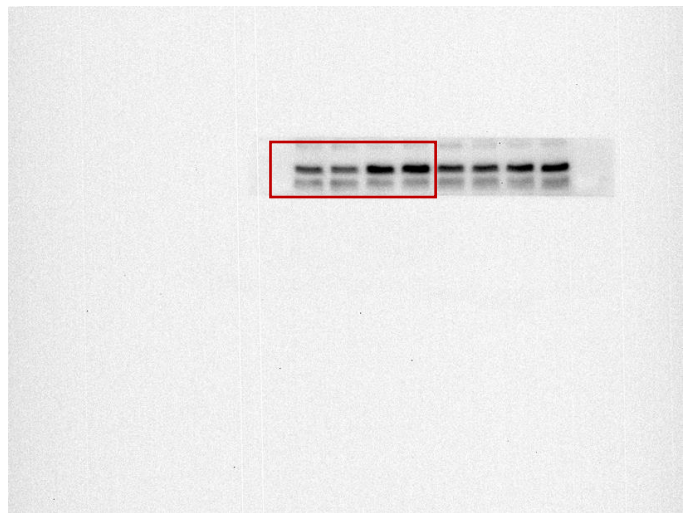

Figure 6I. p19<sup>ARF</sup>

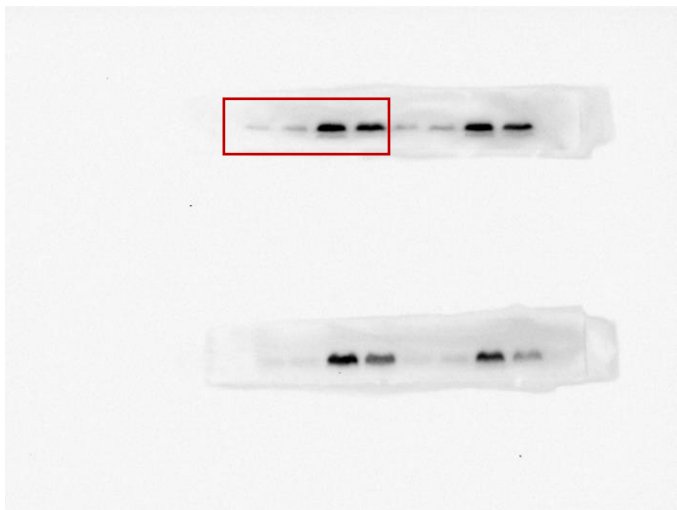

Figure 6I. p21

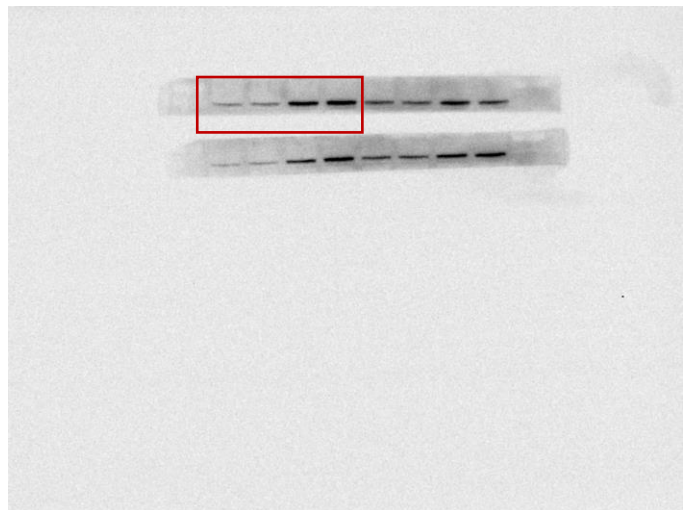

Figure 6I. TGFβ1

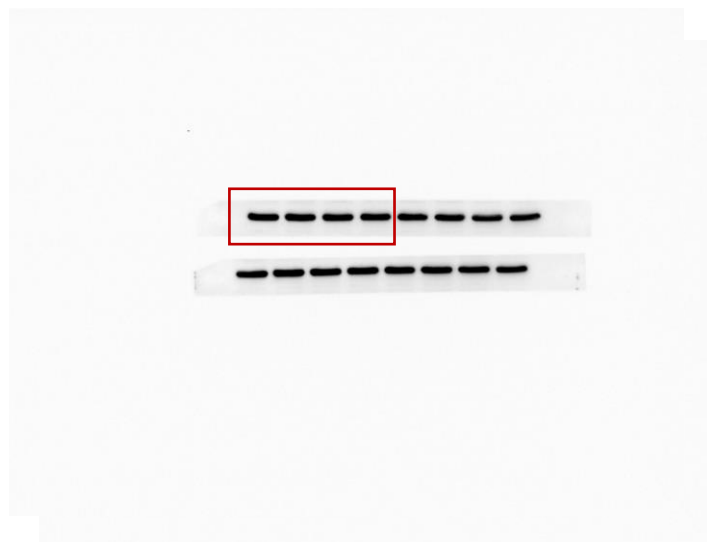

Figure 6I. β-Actin

## Figure 6

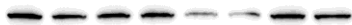

Figure 7B.  $\beta$ -catenin

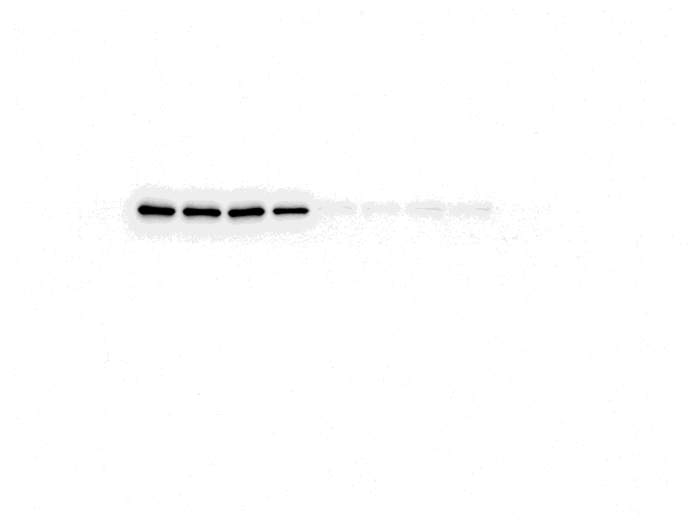

Figure 7B.  $\beta$ -Actin

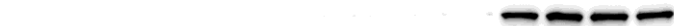

Figure 7B. Histone H3

**Figure 7**

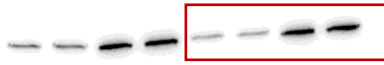

Figure 7E. active- $\beta$ -catenin

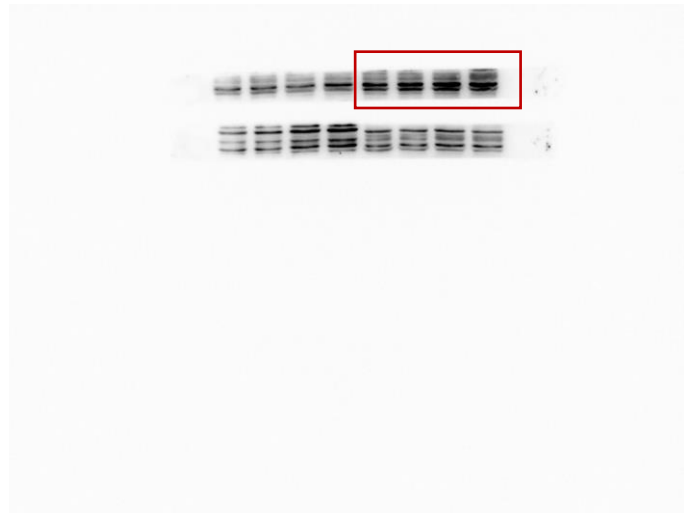

Figure 7E. MMP-7

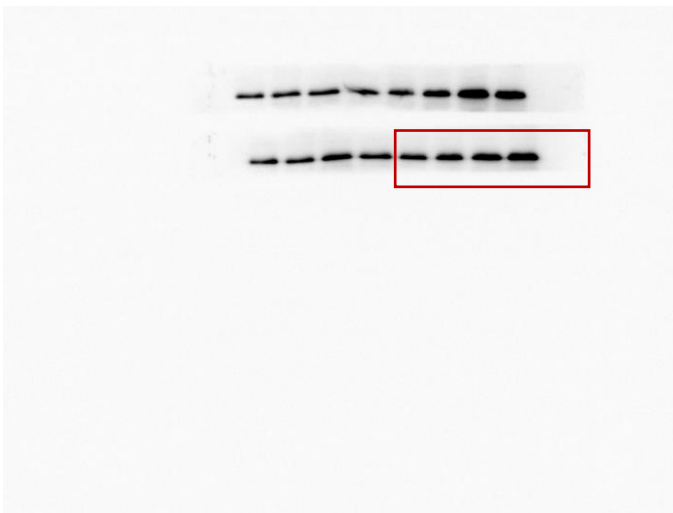

Figure 7E. Snail-1

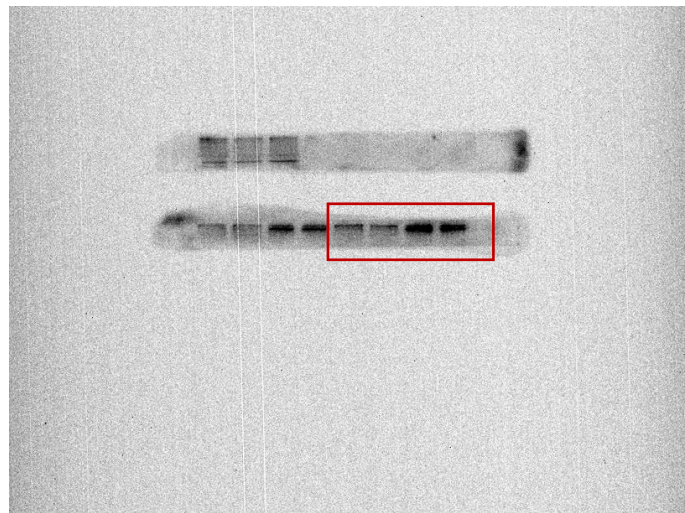

Figure 7E. PAI-1

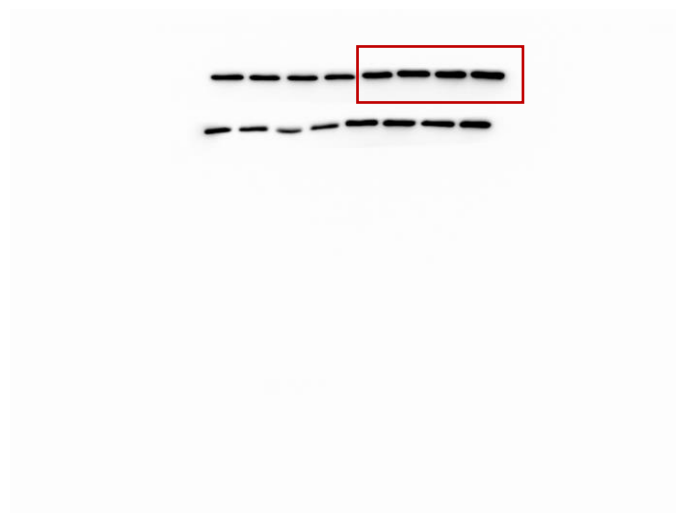

Figure 7E.  $\beta$ -Actin

## Figure 7

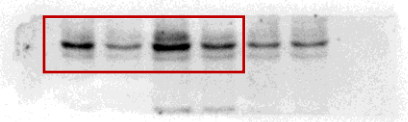

Figure 7J. p16<sup>INK4a</sup>

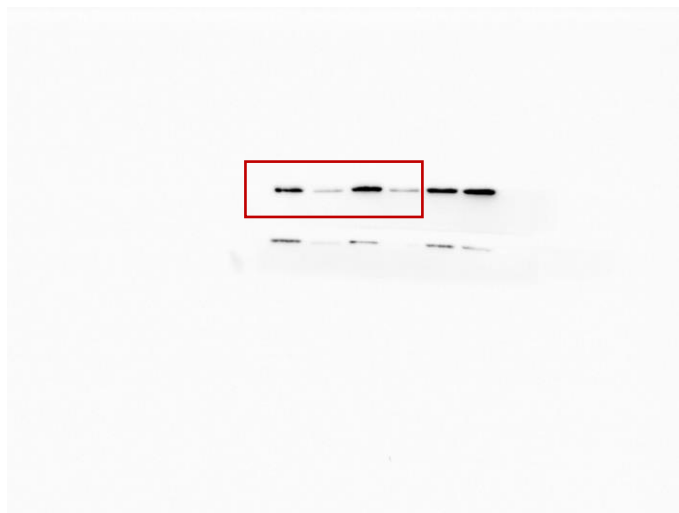

Figure 7J. p21

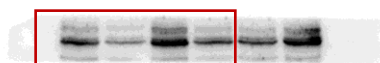

Figure 7J. p19<sup>ARF</sup>

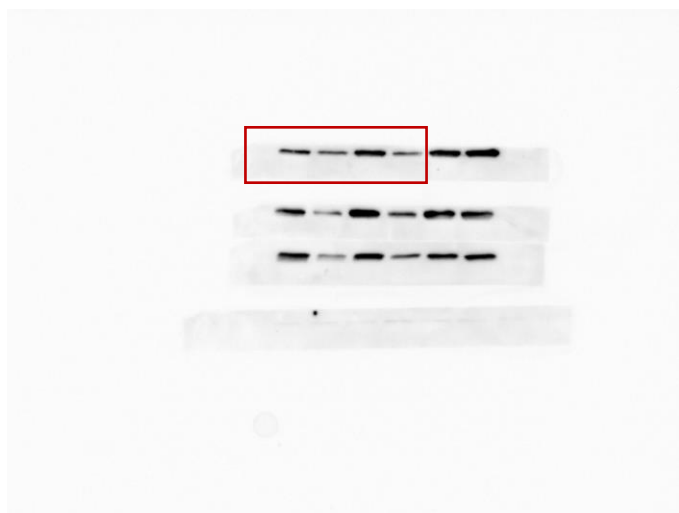

Figure 7J. TGFβ1

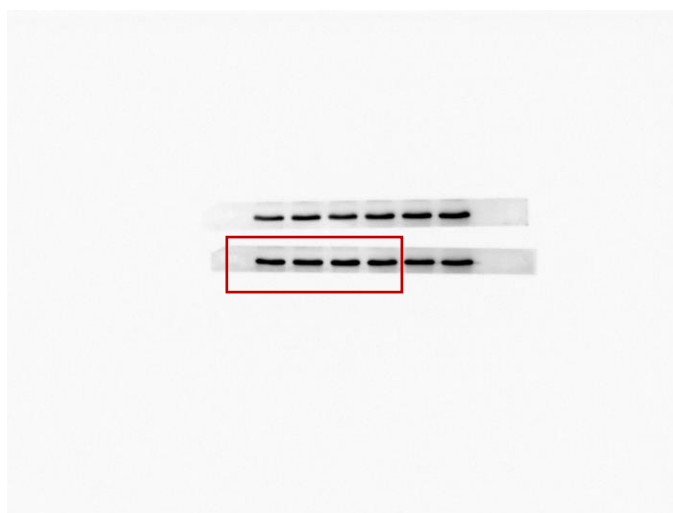

Figure 7J. β-Actin

## Figure 7

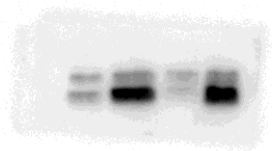

Figure 8A. LC3 A/B

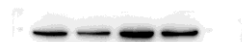

Figure 8A. SQSTM1

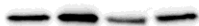

Figure 8A. Beclin-1

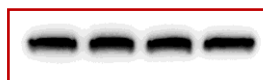

Figure 8A.  $\beta$ -Actin

## Figure 8

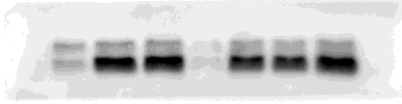

Figure 8C. LC3 A/B

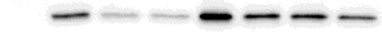

Figure 8C. SQSTM1

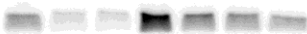

Figure 8C. p16<sup>INK4a</sup>

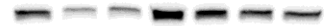

Figure 8C. p21

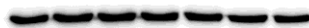

Figure 8C. β-Actin

## Figure 8

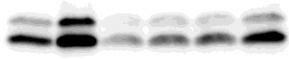

Figure 8H. LC3 A/B

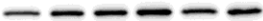

Figure 8H. SQSTM1

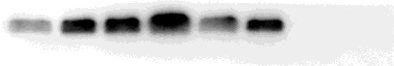

Figure 8H. p16<sup>INK4a</sup>

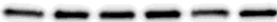

Figure 8H. p21

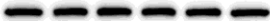

Figure 8H.  $\beta$ -Actin

Figure 8

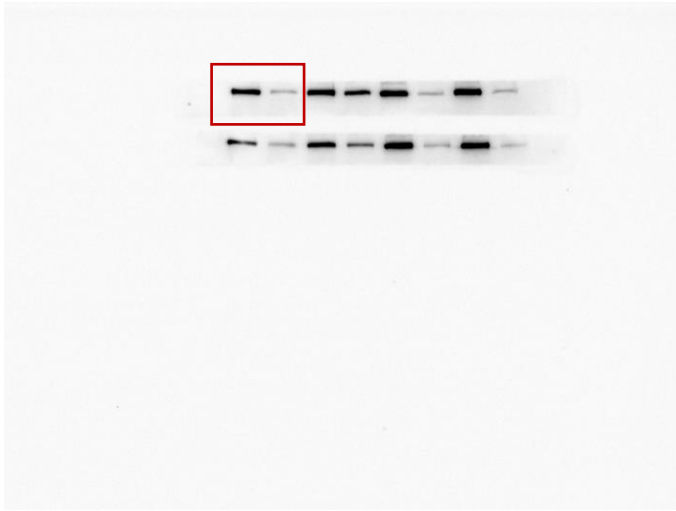

Figure 8M. BRG1

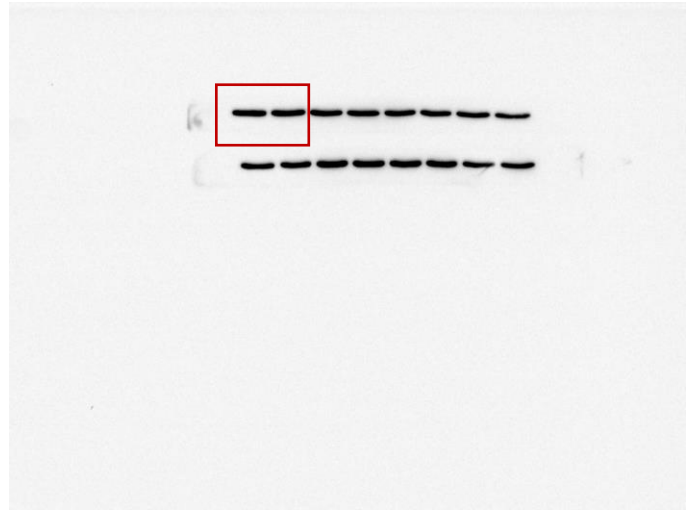

Figure 8M.  $\beta$ -Actin

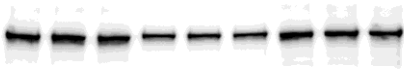

Figure 8P. BRG1

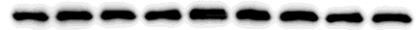

Figure 8P.  $\beta$ -Actin

## Figure 8



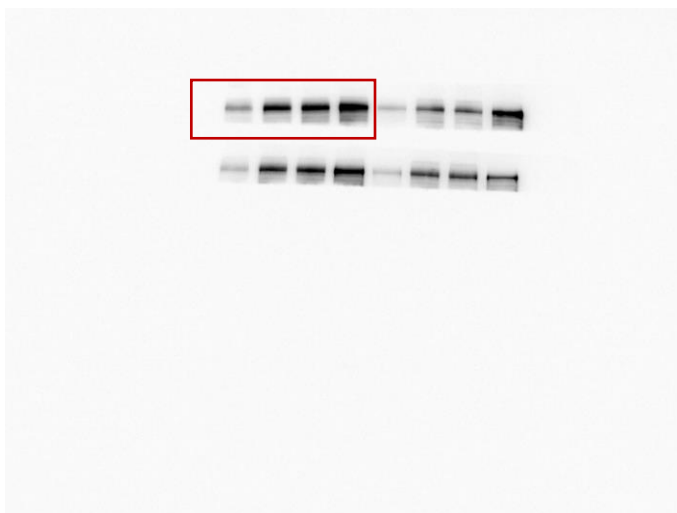

Figure 9H. Fibronectin

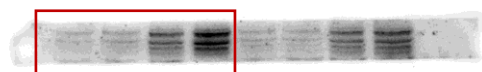

Figure 9H. Collagen I

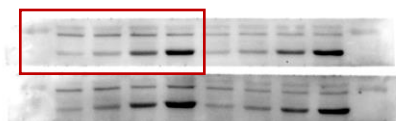

Figure 9H.  $\alpha$ -SMA

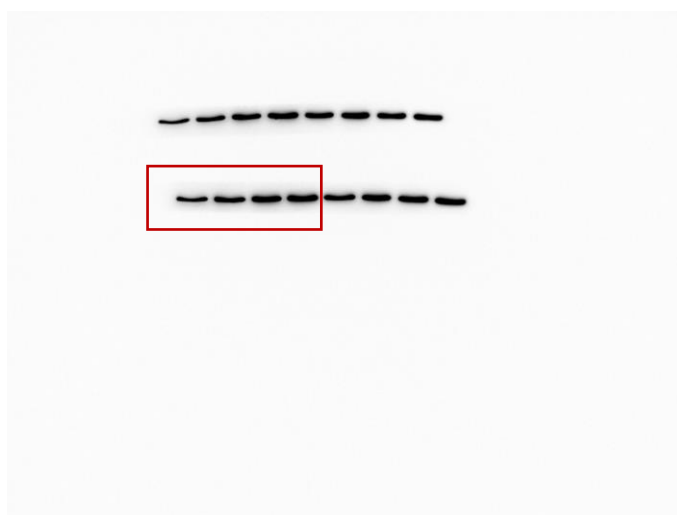

Figure 9H. PCNA

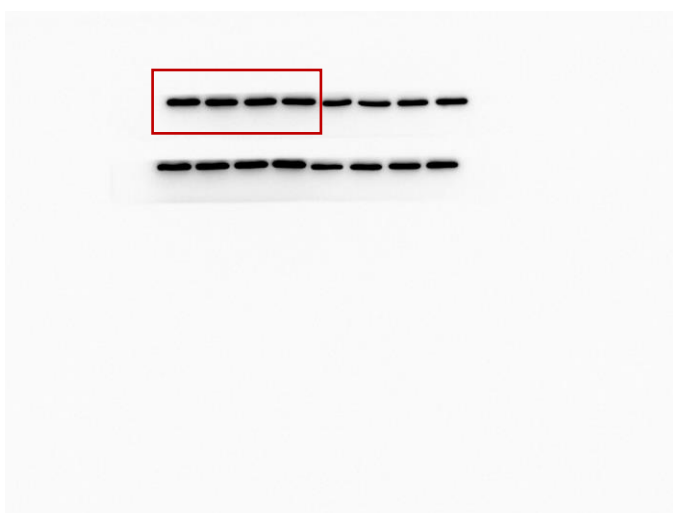

Figure 9H.  $\beta$ -Actin

## Figure 9

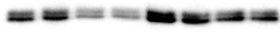

Supplementary Figure 1. BCL-xL

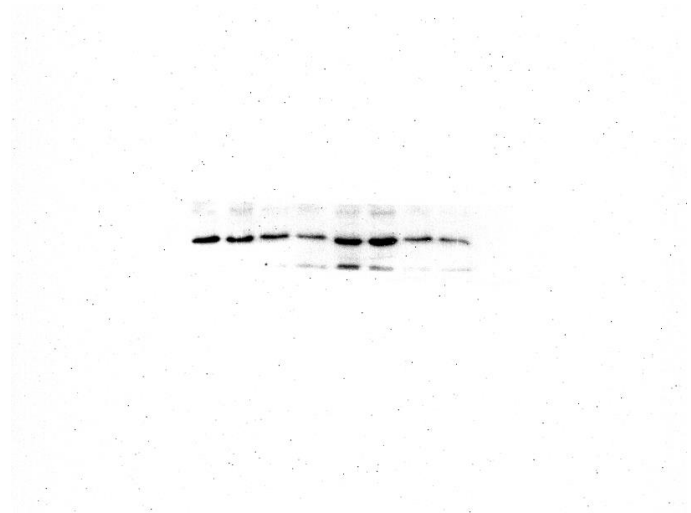

Supplementary Figure 1. BCL-2

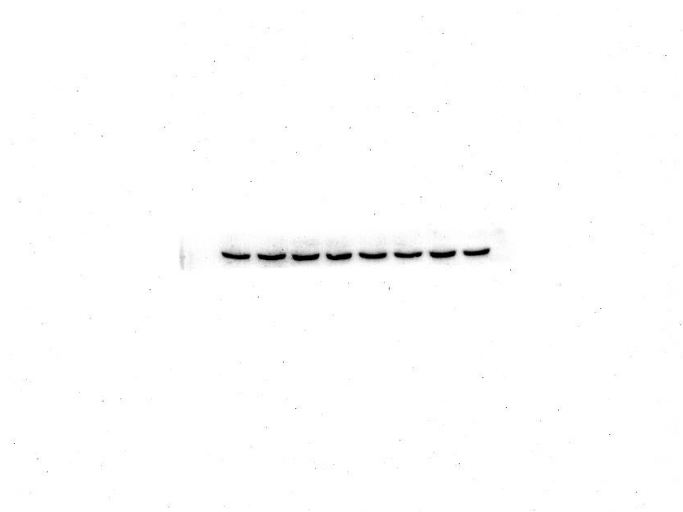

Supplementary Figure 1.  $\beta$ -Actin

## Supplementary Figure 1

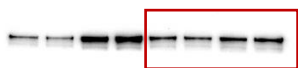

Supplementary Figure 2. BRG1

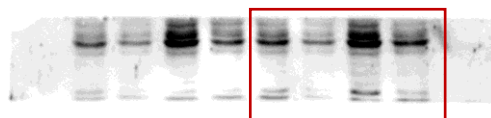

Supplementary Figure 2. p16<sup>INK4a</sup>

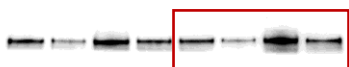

Supplementary Figure 2. Fibronectin

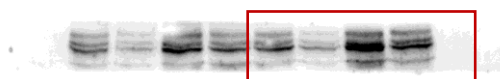

Supplementary Figure 2. Collagen I

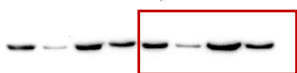

Supplementary Figure 2. α-SMA

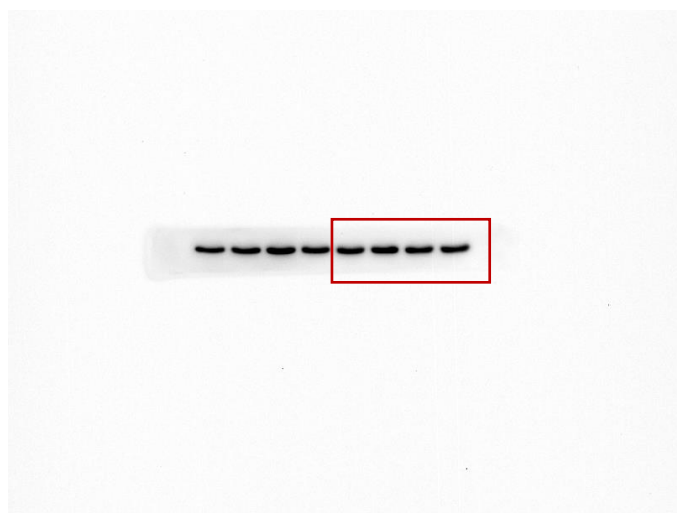

Supplementary Figure 2. β-Actin

## Supplementary Figure 2

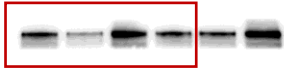

Supplementary Figure 4. Fibronectin

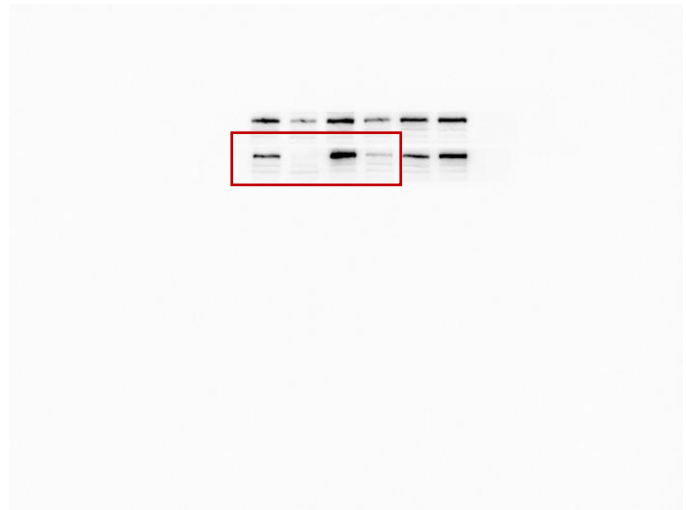

Supplementary Figure 4. Collagen I

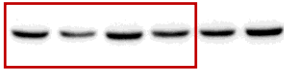

Supplementary Figure 4.  $\alpha$ -SMA

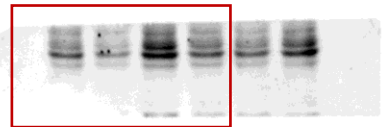

Supplementary Figure 4. PAI-1

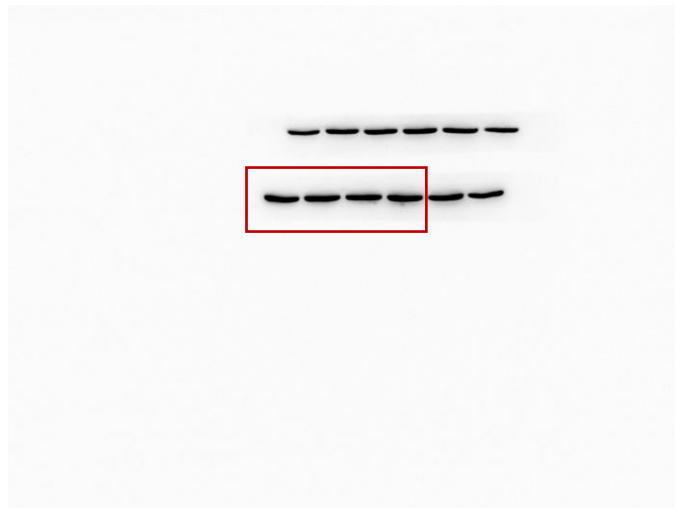

Supplementary Figure 4.  $\beta$ -Actin

## Supplementary Figure 4

**Supplementary Figure 6.** Full bands of all proteins (Figure 1-9 and Supplemental Figures).

**Supplementary Table 1. Primer sequences used for the qRT-PCR analysis**

| Gene           | Forward (5'-3')         | Reverse (5'-3')          |
|----------------|-------------------------|--------------------------|
| $\beta$ -Actin | CAGCTGAGAGGGAAATCGTG    | CGTTGCCAATAGTGATGACC     |
| Wnt1           | TGACAACATCGATTTTGGTCGC  | CCTCGTTGTTGTGAAGGTTTCATG |
| Wnt2           | GTGATGTGTGACAATGTGCCA   | GTTGCAGTTCCAGCGATGC      |
| Wnt2b          | TTGTGTCAACGCTACCCAGA    | ACCACTCCTGCTGACGAGAT     |
| Wnt3           | GGGGCGTATTCAAGTAGCTG    | GTAGGGACCTCCCATTGGAT     |
| Wnt3a          | TTCTTACTTGAGGGCGGAGA    | CTGTCTGGGTCAAGAGAGGAG    |
| Wnt4           | CGAGGAGTGCCAATACCACT    | GTCACAGCCACACTTCTCCA     |
| Wnt5a          | CATCGACTATGGCTACCGCTT   | GTATACTGTCCTACGGCCTGC    |
| Wnt5b          | GGAGATGTTTCATCATTGGCGC  | CTGGTGTTGGCACTCTCTGAT    |
| Wnt6           | CTCCTACAGTGTGGTTGTCAGG  | GCGCATCCATAAAGAGTCTTGA   |
| Wnt7a          | GACAAATACAACGAGGCCGT    | GGCTGTCTTATTGCAGGCTC     |
| Wnt7b          | CTTCACCTATGCCATCACGG    | TGGTTGTAGTAGCCTTGCTTCT   |
| Wnt8a          | AAAGGGAAGGATGCCAGAGC    | TTTCCCATCTGCCGGAAGTC     |
| Wnt8b          | CTGCACAACAATGAGGCTGG    | CGCCGCATGATACTTCTCCT     |
| Wnt9a          | TCGTGGGTGTGAAGGTGATAA   | TCCAGTGGCTTCATTGGTAGT    |
| Wnt9b          | GGGTGTGTGTGGTGACAATC    | TCCAACAGGTACGAACAGCA     |
| Wnt10a         | CAGATCGCCATCCATGAGTG    | ACCGCAAGCCTTCAGTTTACC    |
| Wnt10b         | ATCGCCGTTTCACGAGTGTC    | GGAAACCGCGCTTGAGGAT      |
| Wnt11          | ATGCGTCTACACAACAGTGAAG  | GTAGCGGGTCTTGAGGTCAG     |
| Wnt16          | CCCTCTTTGGCTATGAGCTG    | TACTGGACATCATCCGAGCA     |
| FZD1           | GCCAGCCATCAAACTATAACC   | GTGCCAATGAACAGATAAACGA   |
| FZD2           | CGTATACCTGTTTCATCGGTACA | GAAGGCCTGCTCATAGAAGTAG   |
| FZD3           | CTGGATTGTTCTCGGGATTTTC  | AAATTCAAATCCACAAGTCGGG   |
| FZD4           | TGGAAAGGCTAATGGTCAAGAT  | CCCACGAGCAAAGACATAAAAA   |
| FZD5           | TCTTCCTGTGCTCTATGTACAC  | TAATCCATACACAGAACCTCGG   |
| FZD6           | CGGTCTTCTGGGTTGGAAGC    | CAGGACTCTTGCAGCACTCG     |
| FZD7           | CAGGACTCTTGCAGCACTCG    | CTCATAAAAGTAGCAGGCCAAC   |

---

|       |                        |                          |
|-------|------------------------|--------------------------|
| FZD8  | CATATTCCTCTCCGCCTGTTAC | CAGTGGTTTCATAGCGAACATG   |
| FZD9  | TGGTTTTGACTCTAACCTGGTT | CAGTACCAGGTAGCAAGATAGG   |
| FZD10 | GAGAAGCTCATGGTACGCATAG | CCATGTTGAGGCGTTCATAAAA   |
| LRP5  | CACACCATGCGAGGAGGACAAC | CGAGCCAGCAGCAGCACTTC     |
| LRP6  | TGCGAAGACCACAGCGATGAAC | TGACCATTGGCACAGCGGAAC    |
| GSK3b | CAACGCCACAGCAGCCTCAG   | CAGGTGGAGTTGGAAGCTGATGC  |
| DVL1  | ATGGCGGAGACCAAAATCATC  | AACTTGGCATTGTCATCGAAGA   |
| DVL2  | TGTCGTCAGATACCCACAG    | CTGGATACATTAGGGTGGGAAGGA |
| Axin1 | CTCCAAGCAGAGGACAAAATCA | GGATGGGTTCCCCACAGAAATA   |

---
